# Supplementary material for: Plants Used in Mexican Traditional Medicine for the Management of Urolithiasis: A Review of Preclinical Evidence, Bioactive Compounds, and Molecular Mechanisms
Source: Molecules. 2022 Mar 21;27(6):2008. doi: 10.3390/molecules27062008 (PMC8949565; doi:10.3390/molecules27062008)
Supplement: Supplementary file 1 [file molecules-27-02008-s001.zip › molecules-1626767 Supplementary.pdf]

**Supplementary Table S1.** Traditional consumption and dose of medicinal plants for urolithiasis.

| Common name        | Binomial nomenclature                                  | Traditional consumption and dose                                                                                                                          | Reference               |
|--------------------|--------------------------------------------------------|-----------------------------------------------------------------------------------------------------------------------------------------------------------|-------------------------|
| Chicalote amarillo | <i>Argemone mexicana</i> L                             | This plant is consumed as infusion.<br>Traditional dose: Three grams in a liter of water, it is drunk three cups a day for periods not exceeding 10 days. | [78], ([79], pp. 48-49) |
| Palo amarillo      | <i>Berberis trifoliata</i> Hartw. Ex Lindl             | There are not documented evidence about consumption or doses of this plant. Traditional dose: Not available                                               | Not available           |
| Planta de insulina | <i>Costus mexicanus</i> Liebm                          | This plant is consumed as tea or infusion.<br>Traditional dose: Not available                                                                             | [80]                    |
| Cenizo             | <i>Chenopodium album</i> L.                            | This plant is consumed as infusion<br>Traditional dose: Not available                                                                                     | [45]                    |
| Visnaga            | <i>Ammi visnaga</i> (L.) Lam.                          | Consumed through preparations made from the decoction and/or powdered plant.<br>Traditional dose: Not available                                           | [47]                    |
| Palo azul          | <i>Eysenhardtia polystachya</i> (Ortega) Sarg          | This plant is consumed as tea.<br>Traditional dose: One or two pieces of stem in one liter of water.                                                      | [81, 82]                |
| Doradilla          | <i>Selaginella lepidophylla</i> (Hook. & Grev.) Spring | This plant is consumed as tea or infusion.<br>Traditional dose: Three leaves of the plant in a liter of water, it is drunk daily after meal.              | [83, 84]                |
| Dandelion          | <i>Taraxacum officinale</i> L                          | This plant is consumed as tea or infusion.<br>Traditional dose: Six grams of whole plant in a liter of water. Drink one cup each six hours for 25 days.   | ([79], pp. 58-59), [86] |
